# Supplementary material
Source: Springer Nature journal article supplement (https://www.springermedizin.de/resource/supplementary/12958_2010_702_MOESM1_ESM.pdf/9568624)
Supplement: MOESM1 [file 9568624]

Pronuclear morphology

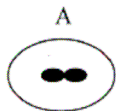

Centralized  
Juxtaposed

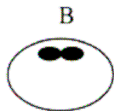

Non-centralized  
Juxtaposed

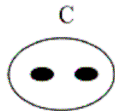

Centralized  
Non-juxtaposed

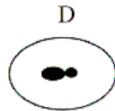

Different  
size

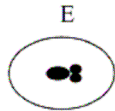

Fragmented

Nucleolar morphology

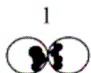

Large-size  
aligned

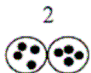

Large-size  
scattered

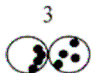

Large-size  
1 pronucleus aligned

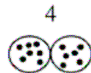

Small-size  
scattered

Polar body alignment

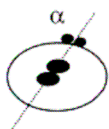

Longitudinal

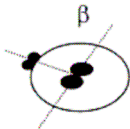

Perpendicular

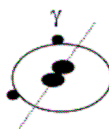

Others
